# Supplementary material for: Identification of the Chemical Constituents in Aqueous Extract of Zhi-Qiao and Evaluation of Its Antidepressant Effect
Source: PubMed Central journal article supplement (PMC6272419; doi:10.3390/molecules20046925), 2015-04-16
Supplement: molecules-20-06925-s001.pdf [file molecules-20-06925-s001.pdf]

## Supplementary Materials

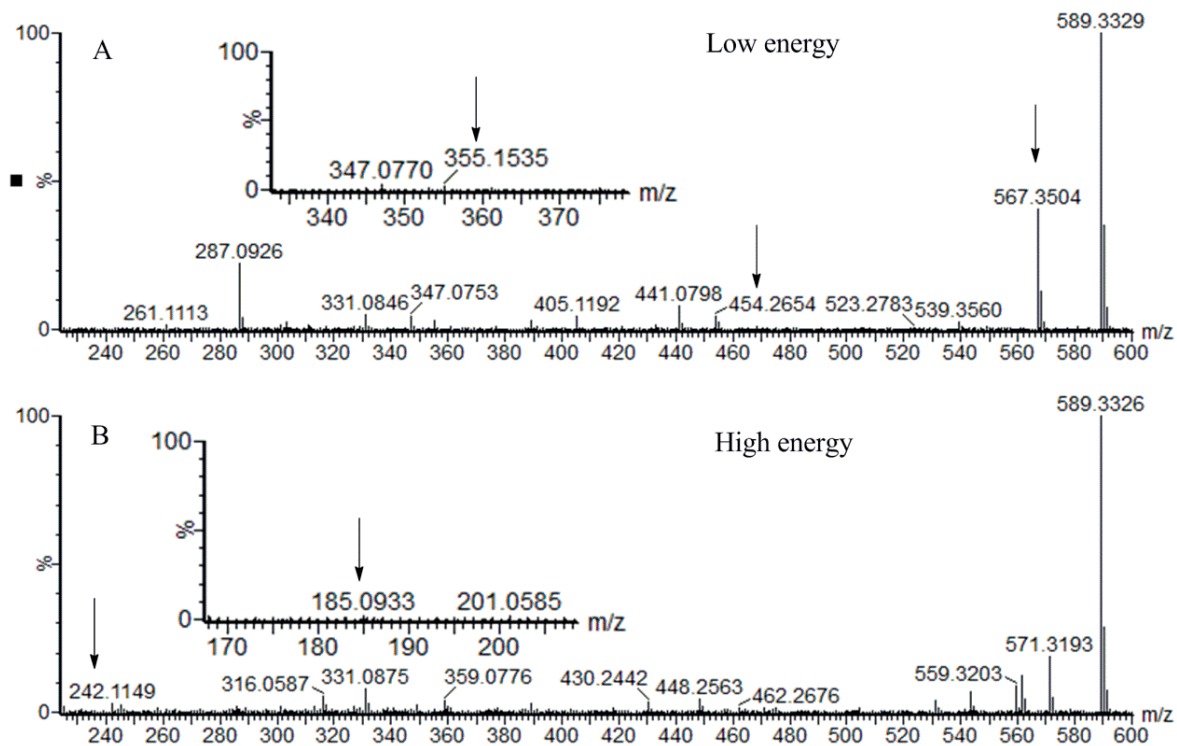

Figure S1. The low energy (A) and high energy (B)  $MS^E$  spectra of ion at  $m/z$  589.3329 (19).

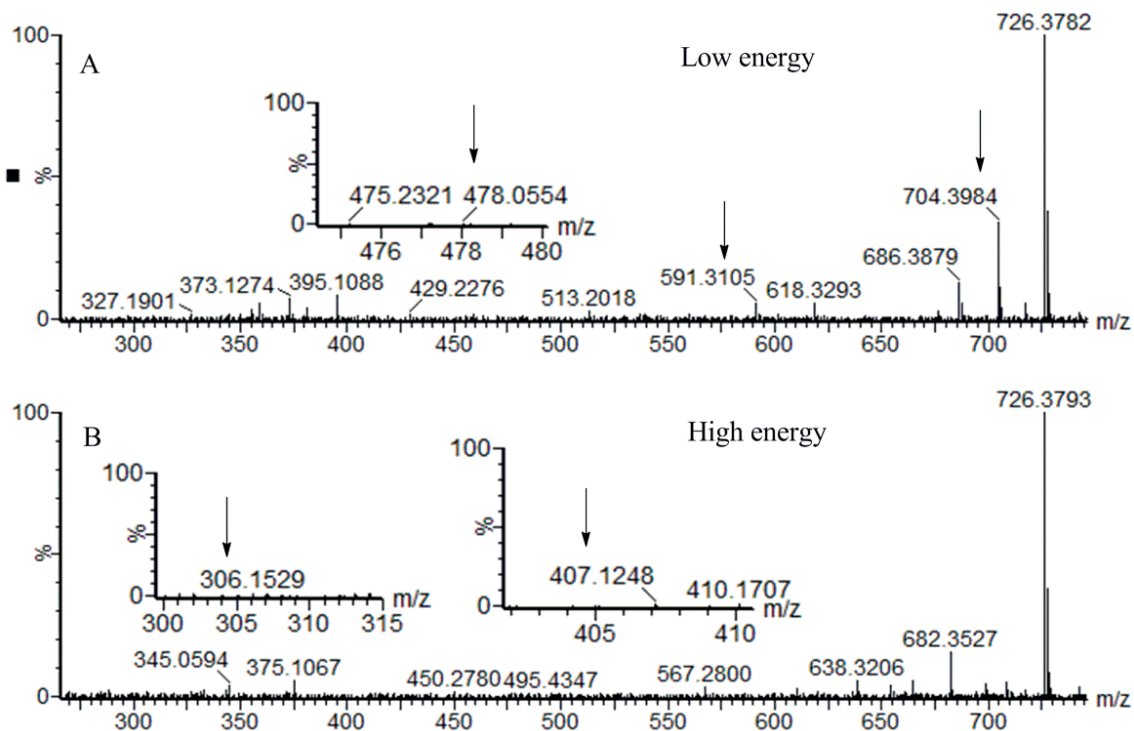

Figure S2. The low energy (A) and high energy (B)  $MS^E$  spectra of ion at  $m/z$  726.3782 (26).

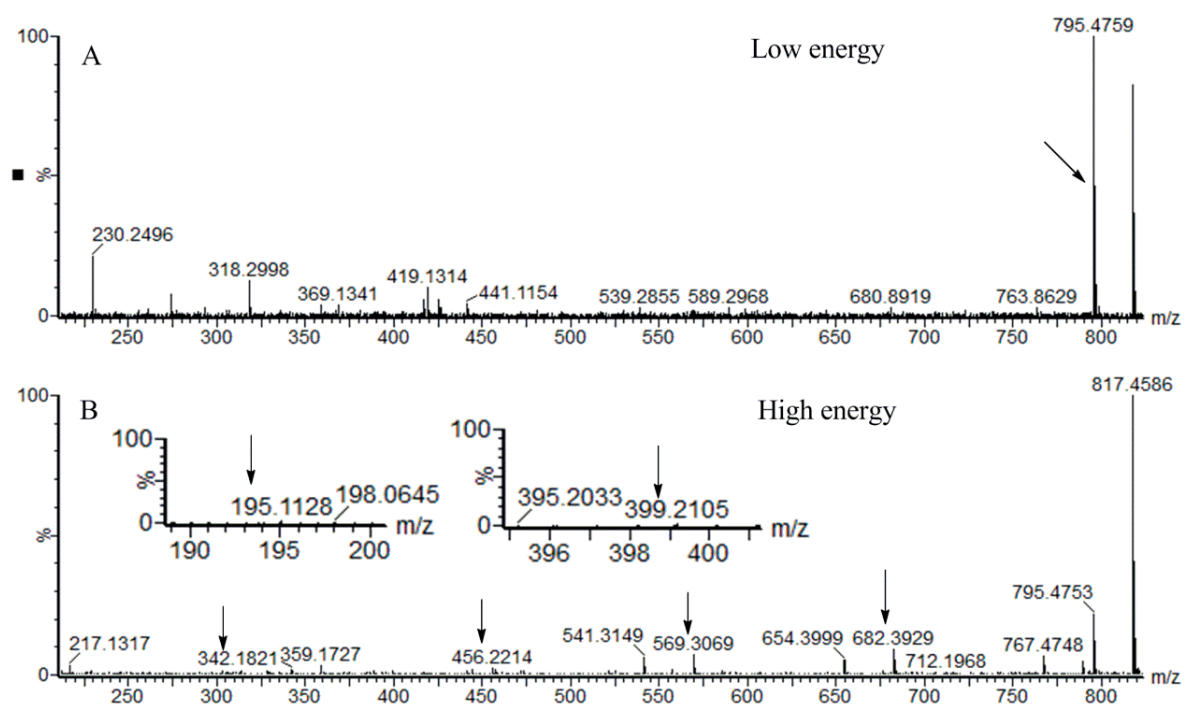

**Figure S3.** The low energy (A) and high energy (B) MS<sup>E</sup> spectra of ion at *m/z* 817.4586 (**29**).
